# Supplementary material for: Novel Angiotensin-Converting Enzyme-Inhibitory Peptides Obtained from Trichiurus lepturus: Preparation, Identification and Potential Antihypertensive Mechanism
Source: MDPI journal article supplement (doi:10.3390/biom14050581), 2024-05-15
Supplement: s1 [file s1]

## Supplemental Information

# Novel Angiotensin-Converting Enzyme-Inhibitory Peptides Obtained from *Trichiurus lepturus*: Preparation, Identification and Potential Antihypertensive Mechanism

Jiaming Cao <sup>1,2</sup>, Boyuan Xiang <sup>1,2</sup>, Baojie Dou <sup>1,2</sup>, Jingfei Hu <sup>1,2</sup>, Lei Zhang <sup>1,2</sup>, Xinxin Kang <sup>1,2</sup>, Mingsheng Lyu <sup>1,2</sup> and Shujun Wang <sup>1,2,\*</sup>

<sup>1</sup> Jiangsu Key Laboratory of Marine Bioresources and Environment/Jiangsu Key Laboratory of Marine Biotechnology, Jiangsu Ocean University, Lianyungang 222005, China; jmcao@jou.edu.cn (J.C.); xby@jou.edu.cn (B.X.); bjdou@jou.edu.cn (B.D.); jfhu123@jou.edu.cn (J.H.); leizhang@jou.edu.cn (L.Z.); kangxinxin@jou.edu.cn (X.K.); mslyu@jou.edu.cn (M.L.)

<sup>2</sup> Co-Innovation Center of Jiangsu Marine Bio-Industry Technology, Jiangsu Ocean University, Lianyungang 222005, China

\* Correspondence: sjwang@jou.edu.cn

Table S1 the characteristis of peptides

| Peptide Sequence | SVM score | Predicti on | Hydrophob icity | Hydropathi city | Hydrophili city | Char ge | Mol wt  |
|------------------|-----------|-------------|-----------------|-----------------|-----------------|---------|---------|
| KRIEAPPH IF      | 1.79      | AHT         | -0.17           | -0.47           | 0.19            | 1       | 1207.56 |
| AEPVPGK M        | 1.7       | AHT         | -0.08           | -0.39           | 0.34            | 0       | 828.1   |
| IFPRNPP          | 1.45      | AHT         | -0.18           | -0.79           | -0.16           | 1       | 840.07  |
| IPGPPTGPI K      | 1.4       | AHT         | 0.02            | -0.28           | -0.1            | 1       | 976.31  |
| VPIGAFK          | 1.38      | AHT         | 0.16            | 1.06            | -0.47           | 1       | 730.99  |
| VPIGAFK          | 1.38      | AHT         | 0.16            | 1.06            | -0.47           | 1       | 730.99  |
| RIEAPPHIF        | 1.36      | AHT         | -0.07           | -0.09           | -0.12           | 0       | 1079.37 |
| EAPPHIF          | 1.35      | AHT         | 0.06            | -0.11           | -0.33           | -1      | 810     |
| FDKPVSP          | 1.31      | AHT         | -0.15           | -0.63           | 0.33            | 0       | 788.9   |

|           |      |     |       |       |       |    |       |
|-----------|------|-----|-------|-------|-------|----|-------|
|           |      |     |       |       |       |    | 8     |
| PGAPGSPG  | 1.28 | AHT | 0.04  | -0.47 | -0.15 | 0  | 867.1 |
| MP        |      |     |       |       |       |    | 2     |
| FDKPV SPL | 1.27 | AHT | 0.01  | 0.24  | -0.22 | 0  | 1049. |
| F         |      |     |       |       |       |    | 34    |
| KAEPVPG   | 1.25 | AHT | -0.19 | -0.78 | 0.63  | 1  | 956.2 |
| KM        |      |     |       |       |       |    | 9     |
| FAPPAPNG  | 1.19 | AHT | 0.09  | 0.03  | -0.48 | 0  | 966.2 |
| VP        |      |     |       |       |       |    | 3     |
| LPPIAF    | 1.19 | AHT | 0.33  | 1.62  | -1.1  | 0  | 656.8 |
|           |      |     |       |       |       |    | 8     |
| NFPPGPPG  | 1.18 | AHT | 0.07  | -0.5  | -0.41 | 0  | 992.2 |
| IP        |      |     |       |       |       |    | 7     |
| IEAPPHIF  | 1.17 | AHT | 0.14  | 0.46  | -0.51 | -1 | 923.1 |
|           |      |     |       |       |       |    | 7     |
| ILPPGPPTP | 1.16 | AHT | 0.13  | -0.17 | -0.74 | 0  | 1074. |
| W         |      |     |       |       |       |    | 42    |
| FDKPV SPL | 1.13 | AHT | -0.07 | -0.07 | 0.06  | 0  | 902.1 |
|           |      |     |       |       |       |    | 5     |
| KWEAP     | 1.12 | AHT | -0.23 | -1.62 | 0.42  | 0  | 629.7 |
|           |      |     |       |       |       |    | 8     |
| VILPVPAF  | 0.94 | AHT | 0.38  | 2.26  | -1.2  | 0  | 855.1 |
|           |      |     |       |       |       |    | 8     |
| GPTGPAGP  | 0.8  | AHT | -0.16 | -1.04 | 0.23  | 1  | 809.0 |
| R         |      |     |       |       |       |    | 1     |
| GRPGPPG   | 0.77 | AHT | -0.11 | -0.88 | 0.17  | 1  | 833.0 |
| VP        |      |     |       |       |       |    | 8     |
| FINPDPI   | 0.73 | AHT | 0.08  | 0.23  | -0.41 | -1 | 815.0 |
|           |      |     |       |       |       |    | 1     |
| PAAKPLG   | 0.73 | AHT | -0.03 | 0.02  | 0.16  | 0  | 881.1 |
| DL        |      |     |       |       |       |    | 4     |
| GPAGPAGP  | 0.69 | AHT | -0.11 | -0.77 | 0.22  | 1  | 778.9 |
| R         |      |     |       |       |       |    | 8     |
| FLGLMWF   | 0.54 | AHT | 0.34  | 1.34  | -1.54 | 0  | 863.1 |

|          |       |      |       |       |       |    |       |
|----------|-------|------|-------|-------|-------|----|-------|
| LP       |       |      |       |       |       |    | 8     |
| QGPIGPR  | 0.53  | AHT  | -0.22 | -1.07 | 0.2   | 1  | 723.9 |
|          |       |      |       |       |       |    | 2     |
| GAQGPIGP | 0.43  | AHT  | -0.13 | -0.68 | 0.1   | 1  | 852.0 |
| R        |       |      |       |       |       |    | 8     |
| KDPIDPPW | 0.37  | AHT  | -0.21 | -1.51 | 0.48  | -1 | 967.1 |
|          |       |      |       |       |       |    | 9     |
| KAETPG   | 0.34  | AHT  | -0.27 | -1.32 | 0.76  | 1  | 958.2 |
| KM       |       |      |       |       |       |    | 6     |
| AWKPPLQ  | 0.29  | AHT  | -0.11 | -0.84 | -0.36 | 1  | 839.1 |
| NFSLDGPI | 0.26  | AHT  | 0.03  | -0.03 | -0.29 | -1 | 959.1 |
| P        |       |      |       |       |       |    | 7     |
| AGFAGDD  | 0.24  | AHT  | -0.16 | -0.57 | 0.5   | -1 | 976.1 |
| APR      |       |      |       |       |       |    | 3     |
| DQLLHPT  | 0.24  | AHT  | -0.14 | -0.7  | -0.19 | -1 | 823   |
| FAGDDAP  | 0.23  | AHT  | -0.25 | -0.89 | 0.69  | -1 | 847.9 |
| R        |       |      |       |       |       |    | 7     |
| GSPRAPEG | 0.04  | AHT  | -0.2  | -1.08 | 0.53  | 0  | 938.1 |
| AP       |       |      |       |       |       |    | 3     |
| GVDNPGH  | 0.01  | AHT  | 0.03  | -0.27 | -0.31 | -1 | 1052. |
| PFI      |       |      |       |       |       |    | 29    |
| HLPPPPP  | -0.01 | Non- | -0.03 | -1.06 | -0.33 | 0  | 753.9 |
|          |       | AHT  |       |       |       |    | 8     |
| VDNPGHP  | -0.05 | Non- | -0.07 | -0.85 | -0.16 | -1 | 882.0 |
| F        |       | AHT  |       |       |       |    | 5     |
| DPLYPPGP | -0.43 | Non- | -0.15 | -1.33 | 0.19  | 0  | 1080. |
| PK       |       | AHT  |       |       |       |    | 37    |
| AAPEPAPA | -0.68 | Non- | -0.1  | -0.66 | 0.4   | 0  | 948.2 |
| PK       |       | AHT  |       |       |       |    |       |
| TEAPLNPK | -0.7  | Non- | -0.24 | -1.15 | 0.44  | 0  | 869.0 |
|          |       | AHT  |       |       |       |    | 8     |
| IAGPKELG | -0.83 | Non- | 0.06  | 0.46  | 0.01  | 0  | 897.1 |
| L        |       | AHT  |       |       |       |    | 9     |
| VSGILDPI | -1.53 | Non- | 0.11  | 1.06  | -0.24 | 0  | 1054. |

|          |       |      |      |      |       |   |       |
|----------|-------|------|------|------|-------|---|-------|
| KL       |       | AHT  |      |      |       |   | 41    |
| LSVAFIAA | -1.55 | Non- | 0.37 | 2.56 | -1.19 | 0 | 1035. |
| ML       |       | AHT  |      |      |       |   | 42    |

**Table S2. parameter of peptides**

| Peptides   | The frequency of<br>bioactive fragments<br>occurrence in<br>protein sequence<br>(A) | Potential biological activity of<br>protein (B) |
|------------|-------------------------------------------------------------------------------------|-------------------------------------------------|
| FAGDDAPR   | 0.750                                                                               | 0.042                                           |
| QGPIGPR    | 0.857                                                                               | 0.037                                           |
| IFPRNPP    | 0.714                                                                               | 0.036                                           |
| AGFAGDDAPR | 0.800                                                                               | 0.033                                           |
| GPTGPAGPR  | 1.111                                                                               | 0.030                                           |
| GPAGPAGPR  | 1.111                                                                               | 0.029452511672                                  |
| LPPIAF     | 1.000                                                                               | 0.029130310490                                  |
| PAAKPLGDL  | 0.778                                                                               | 0.029024976543                                  |
| GAQGPIGPR  | 0.778                                                                               | 0.028886287428                                  |
| FAPPAPNGVP | 0.800                                                                               | 0.028602947680                                  |
| GSPRAPEGAP | 0.700                                                                               | 0.025563516214                                  |
| AWKPPLQ    | 0.857                                                                               | 0.021537169640                                  |
| FDKPVSP    | 0.429                                                                               | 0.021146462792                                  |
| FDKPV SPL  | 0.500                                                                               | 0.018873722949                                  |
| ILPPGPPTPW | 1.100                                                                               | 0.018533232814                                  |
| FDKPV SPLF | 0.556                                                                               | 0.017095012568                                  |
| NFSLDGPIIP | 0.444                                                                               | 0.012727750101                                  |
| FLGLMWFLP  | 0.444                                                                               | 0.012111400079                                  |
| GRPGPPGVP  | 1.111                                                                               | 0.011787078216                                  |
| NFPPGPPGIP | 1.000                                                                               | 0.008066456476                                  |
| IPGPPTGPIK | 0.900                                                                               | 0.007170112579                                  |
| EAPPHIF    | 1.000                                                                               | 0.005616546215                                  |
| IEAPPHIF   | 1.000                                                                               | 0.004914477938                                  |
| VILPVPAF   | 0.625000000000                                                                      | 0.005                                           |

|            |       |                |
|------------|-------|----------------|
| RIEAPPHIF  | 0.889 | 0.004368424834 |
| KRIEAPPHIF | 0.900 | 0.004194740245 |
| KAETPGKM   | 0.556 | 0.003939716316 |
| KAEPVPGKM  | 0.444 | 0.003818999205 |
| VPIGAFK    | 0.571 | 0.001282491944 |
| PGAPGSPGMP | 0.700 | 0.000600174028 |
| AEPVPGKM   | 0.375 | 0.000328120137 |
| GVDNPGHPFI | 0.400 | 0.000059879548 |

**Table S3. The 5 peptides were screened**

|            | Allergenicity    | Intestinal<br>stability | Half-<br>Life<br>(s) | Molecular<br>weight<br>(Da) | Isoelectric<br>point | Toxicity      | Amphiphilicity |
|------------|------------------|-------------------------|----------------------|-----------------------------|----------------------|---------------|----------------|
| FAGDDAPR   | NON-<br>ALLERGEN | High                    | 845.510              | 847.970                     | 5.756                | Non-<br>Toxin | 0.310          |
| QGPIGPR    | NON-<br>ALLERGEN | High                    | 834.410              | 723.930                     | 6.710                | Non-<br>Toxin | 0.530          |
| IFPRNPP    | ALLERGEN         | High                    | 874.210              | 840.080                     | 6.653                | Non-<br>Toxin | 0.350          |
| AGFAGDDAPR | ALLERGEN         | High                    | 878.810              | 976.130                     | 5.802                | Non-<br>Toxin | 0.250          |
| GPTGPAGPR  | NON-<br>ALLERGEN | High                    | 775.810              | 809.010                     | 6.581                | Non-<br>Toxin | 0.270          |
